# Supplementary material
Source: Springer Nature journal article supplement (http://www.nature.com/nmeth/journal/vaop/ncurrent/extref/nmeth.f.256-S1.pdf)
Supplement: nmeth.f.256-S1.pdf [file nmeth.f.256-S1.pdf]

Browse Articles
| Nature Methods


Skip to main content

Thank you for visiting nature.com. You are using a browser version with limited support for CSS. To obtain
the best experience, we recommend you use a more up to date browser (or turn off compatibility mode in
Internet Explorer). In the meantime, to ensure continued support, we are displaying the site without styles
and JavaScript.

Advertisement


- View all journals
- Search
- Log in

- Explore content
- About the journal
- Publish with us

- Sign up for alerts
- RSS feed


1. nature
2. nature methods
3. browse articles

# Browse Articles

## Filter By:

Article Type

All

- All
- Analysis (79)
- Advertising Feature: Application Note (205)
- Article (1312)
- Brief Communication (989)
- Comment (92)
- Commentary (81)
- Correspondence (382)
- Editorial (243)
- In Brief (208)
- Method to Watch (136)
- Methods in Brief (308)
- News & Views (385)
- Perspective (112)
- Research Briefing (94)
- Research Highlight (323)
- Research Highlights (1060)
- Review Article (103)
- Technology Feature (236)
- This Month (286)
- Tools in Brief (308)

Year

All

- All
- 2024 (131)
- 2023 (407)
- 2022 (363)
- 2021 (341)
- 2020 (324)
- 2019 (393)
- 2018 (444)
- 2017 (392)
- 2016 (403)
- 2015 (484)
- 2014 (449)
- 2013 (504)
- 2012 (415)
- 2011 (382)
- 2010 (370)
- 2009 (328)
- 2008 (317)
- 2007 (309)
- 2006 (299)
- 2005 (298)

- ### Quantification of absolute labeling efficiency at the single-protein level

  Super-resolution imaging of reference and target structures enables precise determination of the labeling efficiency of high-affinity binding proteins in cells for improved quantitative assessment of protein organization at the single-molecule level.

  - Joschka Hellmeier
  - Sebastian Strauss
  - Ralf Jungmann

  ArticleOpen Access24 Apr 2024
- ### De novo identification of CD4+ T cell epitopes

  SABR-IIs are engineered bifunctional receptors that enable CD4+ T cell antigen discovery.

  - Paul M. Zdinak
  - Nishtha Trivedi
  - Alok V. Joglekar

  ArticleOpen Access24 Apr 2024
- ### scRNA-seq: oh, the joys

  To those who seek transcriptomic information at high resolution, scale and throughput, single-cell RNA sequencing brings the data. Scientists share tips and future plans as they reflect on the method’s rise to stardom.

  - Vivien Marx

  Technology Feature23 Apr 2024
- ### Can AlphaFold’s breakthrough in protein structure help decode the fundamental principles of adaptive cellular immunity?

  This Perspective discusses the potential of protein structure-prediction models for exploring the structural landscape and specificity of TCR–pMHC interactions.

  - Benjamin McMaster
  - Christopher Thorpe
  - Hashem Koohy

  Perspective23 Apr 2024
- ### Simplifying deep learning to enhance accessibility of large-scale 3D brain imaging analysis

  We created DELiVR, a deep-learning pipeline for 3D brain-cell mapping that is trained with virtual reality-generated reference annotations. It can be deployed via the user-friendly interface of the open-source software Fiji, which makes the analysis of large-scale 3D brain images widely accessible to scientists without computational expertise.

  Research Briefing22 Apr 2024
- ### Virtual reality-empowered deep-learning analysis of brain cells

  Generating training data for training deep-learning-based tools is time consuming. The DELiVR pipeline facilitates this process as demonstrated in this study on detecting c-Fos+ cells or microglia in the brain, following tissue clearing and imaging with light-sheet microscopy.

  - Doris Kaltenecker
  - Rami Al-Maskari
  - Ali Ertürk

  ArticleOpen Access22 Apr 2024
- ### Single-cell immune repertoire analysis

  This Review provides an overview of bioinformatic approaches that enable immune repertoire analyses at the single-cell level.

  - Sergio E. Irac
  - Megan Sioe Fei Soon
  - Zewen Kelvin Tuong

  Review Article18 Apr 2024
- ### LiMCA: Hi-C gets an RNA twist

  A multiomics method measures both the cellular three-dimensional genome and transcriptome at the single-cell level.

  - Jane Kawaoka
  - Stavros Lomvardas

  News & Views15 Apr 2024
- ### Quest: my postdoc home

  For a postdoctoral fellowship, it’s advisable to be selective about lab choice and to be clear about expectations.

  - Vivien Marx

  This Month15 Apr 2024
- ### Simultaneous single-cell three-dimensional genome and gene expression profiling uncovers dynamic enhancer connectivity underlying olfactory receptor choice

  LiMCA offers a tool for co-profiling 3D genome structure and gene expression at the single-cell level, enabling researchers to elucidate the olfactory receptor gene selection process.

  - Honggui Wu
  - Jiankun Zhang
  - X. Sunney Xie

  ArticleOpen Access15 Apr 2024
- ### Protein language models using convolutions

  - Lin Tang

  Research Highlight12 Apr 2024
- ### A map of mouse embryogenesis

  - Madhura Mukhopadhyay

  Research Highlight12 Apr 2024
- ### Protein–ligand structure prediction

  - Rita Strack

  Research Highlight12 Apr 2024
- ### Modeling locomotion from environment to neurons

  - Nina Vogt

  Research Highlight12 Apr 2024
- ### Peer review demystified: part 2

  We continue our explanation of the peer review process at *Nature Methods*.

  Editorial12 Apr 2024
- ### The placozoan *Trichoplax*

  After having been largely neglected for more than a century, the tiny marine animal *Trichoplax adhaerens* is enjoying a revival and is now poised to become a mainstream model organism for the study of epithelial evolution, diversification and specialization.

  - Marvin Leria
  - Magali Requin
  - Andrea Pasini

  This Month12 Apr 2024
- ### Pretraining a foundation model for generalizable fluorescence microscopy-based image restoration

  A pretrained foundation model (UniFMIR) enables versatile and generalizable performance across diverse fluorescence microscopy image reconstruction tasks.

  - Chenxi Ma
  - Weimin Tan
  - Bo Yan

  Article12 Apr 2024
- ### Accessible computing platforms democratize neuroimaging data analysis

  Several research groups are making it easier for other neuroscientists to analyze large datasets by providing tools that can be accessed and used from anywhere in the world.

  - Lucina Q. Uddin

  News & Views11 Apr 2024
- ### brainlife.io: a decentralized and open-source cloud platform to support neuroscience research

  brainlife.io is a one-stop cloud platform for data management, visualization and analysis in human neuroscience. It is web-based and provides access to a variety of tools in a reproducible and reliable manner.

  - Soichi Hayashi
  - Bradley A. Caron
  - Franco Pestilli

  Brief CommunicationOpen Access11 Apr 2024
- ### Three million images and morphological profiles of cells treated with matched chemical and genetic perturbations

  The CPJUMP1 Resource comprises Cell Painting images and profiles of 75 million cells treated with hundreds of chemical and genetic perturbations. The dataset enables exploration of their relationships and lays the foundation for the development of advanced methods to match perturbations.

  - Srinivas Niranj Chandrasekaran
  - Beth A. Cimini
  - Anne E. Carpenter

  ResourceOpen Access09 Apr 2024

- Previous page
- page 1
- page 2
- page 3
- …
- page 372
- Next page

## Explore content

- Research articles
- Reviews & Analysis
- News & Comment
- Current issue
- Collections

- Follow us on Twitter
- Sign up for alerts
- RSS feed


## About the journal

- Aims & Scope
- Journal Information
- Journal Metrics
- Our publishing models
- About the Editors
- Research Cross-Journal Editorial Team
- Reviews Cross-Journal Editorial Team
- Editorial Values Statement
- Editorial Policies
- Content Types
- Web Feeds
- Contact


## Publish with us

- Submission Guidelines
- For Reviewers
- Language editing services
- Submit manuscript

## Search

Search articles by subject, keyword or author

Show results from

All journals
This journal

Search

Advanced search

### Quick links

- Explore articles by subject
- Find a job
- Guide to authors
- Editorial policies

Nature Methods (*Nat Methods*)

ISSN 1548-7105 (online)

ISSN 1548-7091 (print)

## nature.com sitemap

### About Nature Portfolio

- About us
- Press releases
- Press office
- Contact us

### Discover content

- Journals A-Z
- Articles by subject
- protocols.io
- Nature Index

### Publishing policies

- Nature portfolio policies
- Open access

### Author & Researcher services

- Reprints & permissions
- Research data
- Language editing
- Scientific editing
- Nature Masterclasses
- Research Solutions

### Libraries & institutions

- Librarian service & tools
- Librarian portal
- Open research
- Recommend to library

### Advertising & partnerships

- Advertising
- Partnerships & Services
- Media kits
- Branded
  content

### Professional development

- Nature Careers
- Nature 
  Conferences

### Regional websites

- Nature Africa
- Nature China
- Nature India
- Nature Italy
- Nature Japan
- Nature Middle East

- Privacy
  Policy
- Use
  of cookies
- Your privacy choices/Manage cookies
- Legal
  notice
- Accessibility
  statement
- Terms & Conditions
- Your US state privacy rights

© 2024 Springer Nature Limited

xml version="1.0" encoding="UTF-8"?
